# Supplementary material for: Bayesian optimization of the composition of the lanthanide metal–organic framework MIL-103 for white-light emission
Source: Royal Society of Chemistry journal article supplement (doi:10.1039/d2me00277a), 2023-01-01
Supplement: d2me00277a1.pdf [file d2me00277a1.pdf]

Electronic Supplementary Information (ESI)

Bayesian optimization of the composition of the lanthanide metal-organic framework  
MIL-103 for white-light emission

Yu Kitamura,<sup>a</sup> Hiroki Toshima,<sup>a</sup> Akihiro Inokuchi,<sup>b</sup> and Daisuke Tanaka<sup>\*a</sup>

---

*a. Department of Chemistry, School of Science, Kwansai Gakuin University, 1  
Gakuen-Uegahara, Sanda, Hyogo 669-1330, Japan*

*b. Program of Computer Science, School of Engineering, Kwansai Gakuin  
University, 1 Gakuen-Uegahara, Sanda, Hyogo 669-1330, Japan.*

*\*Corresponding Author. E-mail: [dtanaka@kwansei.ac.jp](mailto:dtanaka@kwansei.ac.jp).*

## **Table of Contents**

S1. General information

S2. Synthesis

S3. Initial screening and post-Bayesian optimization screening

S4 Synthesis of single MIL-103(Eu, Gd, or Tb)

S5 Initial screening to synthesize MIL-103 exhibiting white-light emission

S6 Bayesian optimization of composition of MIL-103 showing white-light emission

## S1. General information

**Chemicals.** All reagents were purchased and used without further purification. 1,3,5-Tris(4-carboxyphenyl)benzene (H<sub>3</sub>BTB, 98.0%), and *N,N*-dimethylformamide (DMF, 99.95%) were purchased from FUJIFILM Wako Pure Chemical Corporation, Japan. Lanthanide nitrates were purchased from various companies: Gd(NO<sub>3</sub>)<sub>3</sub>·6H<sub>2</sub>O (99.95%) and Tb(NO<sub>3</sub>)<sub>3</sub>·6H<sub>2</sub>O (99.95%) were purchased from Kanto Chemical Co., Inc., Japan; Eu(NO<sub>3</sub>)<sub>3</sub>·6H<sub>2</sub>O (99.9%) was purchased from Kishida Chemical Co., Ltd., Japan.

**Characterization.** Powder X-ray diffraction (PXRD) patterns were recorded on a Rigaku MiniFlex600 diffractometer at 40 kV and 15 mA using a Cu target tube. The samples were examined without grinding, and the data were collected for 2θ values of 2–30 ° using Cu Kα radiation. The excitation and emission spectra were obtained using a HITACHI F-7000 spectrofluorophotometer. Fluorescence spectrum measurements were chosen on the short wavelength side (295 nm) to avoid an overlap with the fluorescence spectrum due to the small Stokes shift of the ligands. The PXRD patterns were simulated based on single-crystal data using the diffraction crystal module of the Mercury software program (version 3.10), which is available at no charge at <http://www.iucr.org>.

### Bayesian optimization.

Bayesian optimization was performed using GPyOpt with the Gaussian Process framework, GPy, in Python. The versions of GPyOpt, GPy, and Python used were 1.2.6, 1.10.0, and 3.8.6, respectively. Given a dataset consisting of samples  $\{(\vec{x}_i, y_i)\}_{i=1}^n$  as input, the Gaussian Process Regression decides the expected value and standard deviation

for  $f(\vec{x})$  based on,  $(f(\vec{x}_1), f(\vec{x}_2), \dots, f(\vec{x}_n), f(\vec{x}))^T \sim \mathcal{N}(0, K)^1$ , where  $K$  is the  $n+1$ -st kernel matrix whose  $(i, j)$ -element represents the similarity between  $\vec{x}_i$  and  $\vec{x}_j$ . The Bayesian optimizer in GpyOpt iteratively samples the next  $\vec{x}_{n+1}$  which minimizes the acquisition function  $\mathbb{E}[\min\{f(\vec{x}_1)\} - \tau, 0]$ , where  $\tau$  is the minimum among  $f(\vec{x}_1), f(\vec{x}_2), \dots, f(\vec{x}_n)$ .

## S2. Synthesis

**Synthetic conditions 1 (MIL-103(Eu, Gd, Tb)).**  $\text{Ln}(\text{NO}_3)_3 \cdot x\text{H}_2\text{O}$  ( $\text{Ln} = \text{Eu, Gd, or Tb}$ ) (17.6 mg, 0.040 mmol) and  $\text{H}_3\text{BTB}$  (5.8 mg, 0.013 mmol) were mixed with 2 mL of DMF/MeOH/ $\text{H}_2\text{O}$  (3:3:0.5) in a 4-mL Teflon-lined stainless-steel container, and the reaction mixture was heated at 80 °C for 48 h. At the end of the heating process, the container was cooled to 30 °C. The heating and cooling times were 5 h and 12 h, respectively. Yield: 55% (MIL103(Eu)), 28% (MIL-103(Gd)), 58% (MIL-103(Tb)) (based on the ligand).

**Synthetic conditions 2 (initial screening).**  $\text{Ln}(\text{NO}_3)_3 \cdot x\text{H}_2\text{O}$  ( $\text{Ln} = \text{Eu, Gd, or Tb}$ ) (Eu :  $9.9 \times 10^{-7}$ – $3.8 \times 10^{-4}$  mmol, Gd : 0.038–0.040 mmol, Tb :  $2.0 \times 10^{-4}$ – $2.5 \times 10^{-3}$  mmol) and  $\text{H}_3\text{BTB}$  (5.8 mg, 0.013 mmol) were mixed with 2 mL of DMF/MeOH/ $\text{H}_2\text{O}$  (3:3:0.5) in a 4-mL Teflon-lined stainless-steel container, and the reaction mixture was heated at 80 °C for 48 h. At the end of the heating process, the container was cooled to 30 °C. The heating and cooling times were 5 and 12 h, respectively.

**Synthetic conditions 3 (optimized synthetic conditions).**  $\text{Ln}(\text{NO}_3)_3 \cdot x\text{H}_2\text{O}$  ( $\text{Ln} = \text{Eu, Gd, or Tb}$ ) (Eu :  $4.98 \times 10^{-2}$  mM,  $9.95 \times 10^{-7}$ – $1.29 \times 10^{-6}$  mmol, Gd : 39.93 mM, 0.0375 mmol, Tb : 4.83 mM,  $1.74 \times 10^{-4}$ – $2.13 \times 10^{-4}$  mmol) and  $\text{H}_3\text{BTB}$  (5.8 mg, 0.013 mmol) were mixed with 2 mL of DMF/MeOH/ $\text{H}_2\text{O}$  (3:3:0.5) in a 4-mL Teflon-lined stainless-steel container, and the reaction mixture was heated at 80 °C for 48 h. At the end of the heating process, the container was cooled to 30 °C. The heating and cooling times were 5 and 12 h, respectively.

**Synthetic conditions 4 (preparation of a white-light emission at initial screening).**  $\text{Ln}(\text{NO}_3)_3 \cdot x\text{H}_2\text{O}$  ( $\text{Ln} = \text{Eu, Gd, or Tb}$ ) (Eu :  $1.1 \times 10^{-6}$  mmol, Gd : 0.040 mmol, Tb :  $2.2 \times 10^{-4}$  mmol) and  $\text{H}_3\text{BTB}$  (5.8 mg, 0.013 mmol) were mixed with 2 mL of DMF/MeOH/ $\text{H}_2\text{O}$  (3:3:0.5) in a 4-mL Teflon-lined stainless-steel container, and the reaction mixture was heated at 80 °C for 48 h. At the end of the heating process, the container was cooled to 30 °C. The heating and cooling times were 5 and 12 h, respectively.

**Synthetic conditions 5 (preparation of a white-light emission at Bayesian optimization).**  $\text{Ln}(\text{NO}_3)_3 \cdot x\text{H}_2\text{O}$  ( $\text{Ln} = \text{Eu, Gd, or Tb}$ ) (Eu :  $1.09 \times 10^{-6}$  mmol, Gd : 0.0375 mmol, Tb :  $1.93 \times 10^{-4}$  mmol) and  $\text{H}_3\text{BTB}$  (5.8 mg, 0.013 mmol) were mixed with 2 mL

of DMF/MeOH/H<sub>2</sub>O (3:3:0.5) in a 4-mL Teflon-lined stainless-steel container, and the reaction mixture was heated at 80 °C for 48 h. At the end of the heating process, the container was cooled to 30 °C. The heating and cooling times were 5 and 12 h, respectively.

### S3 Initial screening and post-Bayesian optimization screening

**Table S1.** Initial synthesis screening conditions of the lanthanide metals.

| Entry | Eu / mmol             | Tb / mmol             | Gd / mmol | Entry | Eu / mmol             | Tb / mmol             | Gd / mmol |
|-------|-----------------------|-----------------------|-----------|-------|-----------------------|-----------------------|-----------|
| 1     | $1.61 \times 10^{-4}$ | $1.86 \times 10^{-3}$ | 0.0378    | 25    | $1.11 \times 10^{-5}$ | $5.56 \times 10^{-4}$ | 0.0395    |
| 2     | $1.69 \times 10^{-4}$ | $1.58 \times 10^{-5}$ | 0.0378    | 26    | $1.65 \times 10^{-5}$ | $5.51 \times 10^{-4}$ | 0.0395    |
| 3     | $1.77 \times 10^{-4}$ | $1.54 \times 10^{-5}$ | 0.0378    | 27    | $2.18 \times 10^{-5}$ | $5.45 \times 10^{-4}$ | 0.0395    |
| 4     | $1.85 \times 10^{-4}$ | $1.49 \times 10^{-5}$ | 0.0378    | 28    | $2.70 \times 10^{-5}$ | $5.40 \times 10^{-4}$ | 0.0395    |
| 5     | $1.93 \times 10^{-4}$ | $1.45 \times 10^{-5}$ | 0.0378    | 29    | $1.20 \times 10^{-5}$ | $5.98 \times 10^{-4}$ | 0.0394    |
| 6     | $2.01 \times 10^{-4}$ | $1.41 \times 10^{-5}$ | 0.0378    | 30    | $1.78 \times 10^{-5}$ | $5.92 \times 10^{-4}$ | 0.0394    |
| 7     | $2.09 \times 10^{-4}$ | $1.37 \times 10^{-5}$ | 0.0378    | 31    | $2.35 \times 10^{-5}$ | $5.87 \times 10^{-4}$ | 0.0394    |
| 8     | $2.17 \times 10^{-4}$ | $1.33 \times 10^{-5}$ | 0.0378    | 32    | $2.90 \times 10^{-5}$ | $5.81 \times 10^{-4}$ | 0.0394    |
| 9     | $2.41 \times 10^{-4}$ | $1.20 \times 10^{-5}$ | 0.0378    | 33    | $1.29 \times 10^{-5}$ | $6.47 \times 10^{-4}$ | 0.0394    |
| 10    | $2.49 \times 10^{-4}$ | $1.16 \times 10^{-5}$ | 0.0378    | 34    | $1.92 \times 10^{-5}$ | $6.41 \times 10^{-4}$ | 0.0394    |
| 11    | $2.57 \times 10^{-4}$ | $1.12 \times 10^{-5}$ | 0.0378    | 35    | $2.54 \times 10^{-5}$ | $6.35 \times 10^{-4}$ | 0.0394    |
| 12    | $2.65 \times 10^{-4}$ | $1.08 \times 10^{-5}$ | 0.0378    | 36    | $3.14 \times 10^{-5}$ | $6.29 \times 10^{-4}$ | 0.0394    |
| 13    | $2.73 \times 10^{-4}$ | $1.04 \times 10^{-5}$ | 0.0378    | 37    | $1.41 \times 10^{-5}$ | $7.05 \times 10^{-4}$ | 0.0394    |
| 14    | $2.81 \times 10^{-4}$ | $9.94 \times 10^{-4}$ | 0.0378    | 38    | $2.09 \times 10^{-5}$ | $6.98 \times 10^{-4}$ | 0.0394    |
| 15    | $2.89 \times 10^{-4}$ | $9.52 \times 10^{-4}$ | 0.0378    | 39    | $2.77 \times 10^{-5}$ | $6.91 \times 10^{-4}$ | 0.0394    |
| 16    | $2.97 \times 10^{-4}$ | $9.10 \times 10^{-4}$ | 0.0378    | 40    | $3.42 \times 10^{-5}$ | $6.85 \times 10^{-4}$ | 0.0394    |
| 17    | $3.21 \times 10^{-4}$ | $7.85 \times 10^{-4}$ | 0.0378    | 41    | $1.55 \times 10^{-5}$ | $7.74 \times 10^{-4}$ | 0.0393    |
| 18    | $3.29 \times 10^{-4}$ | $7.43 \times 10^{-4}$ | 0.0378    | 42    | $2.30 \times 10^{-5}$ | $7.66 \times 10^{-4}$ | 0.0393    |
| 19    | $3.37 \times 10^{-4}$ | $7.02 \times 10^{-4}$ | 0.0378    | 43    | $3.04 \times 10^{-5}$ | $7.59 \times 10^{-4}$ | 0.0393    |
| 20    | $3.45 \times 10^{-4}$ | $6.60 \times 10^{-4}$ | 0.0378    | 44    | $3.76 \times 10^{-5}$ | $7.52 \times 10^{-4}$ | 0.0393    |
| 21    | $3.53 \times 10^{-4}$ | $6.18 \times 10^{-4}$ | 0.0378    | 45    | $1.72 \times 10^{-5}$ | $8.58 \times 10^{-4}$ | 0.0392    |
| 22    | $3.61 \times 10^{-4}$ | $5.77 \times 10^{-4}$ | 0.0378    | 46    | $2.55 \times 10^{-5}$ | $8.50 \times 10^{-4}$ | 0.0392    |
| 23    | $3.69 \times 10^{-4}$ | $5.35 \times 10^{-4}$ | 0.0378    | 47    | $3.37 \times 10^{-5}$ | $8.42 \times 10^{-4}$ | 0.0392    |
| 24    | $3.77 \times 10^{-4}$ | $4.93 \times 10^{-4}$ | 0.0378    | 48    | $4.17 \times 10^{-5}$ | $8.34 \times 10^{-4}$ | 0.0392    |

| Entry | Eu / mmol             | Tb / mmol             | Gd / mmol | Entry | Eu / mmol             | Tb / mmol             | Gd / mmol |
|-------|-----------------------|-----------------------|-----------|-------|-----------------------|-----------------------|-----------|
| 49    | $1.11 \times 10^{-5}$ | $5.56 \times 10^{-4}$ | 0.0395    | 75    | $1.98 \times 10^{-5}$ | $8.01 \times 10^{-4}$ | 0.0392    |
| 50    | $1.65 \times 10^{-5}$ | $5.51 \times 10^{-4}$ | 0.0395    | 76    | $1.98 \times 10^{-5}$ | $8.51 \times 10^{-4}$ | 0.0391    |
| 51    | $2.18 \times 10^{-5}$ | $5.45 \times 10^{-4}$ | 0.0395    | 77    | $1.98 \times 10^{-5}$ | $9.01 \times 10^{-4}$ | 0.0391    |
| 52    | $2.70 \times 10^{-5}$ | $5.40 \times 10^{-4}$ | 0.0395    | 78    | $1.98 \times 10^{-5}$ | $9.51 \times 10^{-4}$ | 0.0390    |
| 53    | $1.20 \times 10^{-5}$ | $5.98 \times 10^{-4}$ | 0.0394    | 79    | $1.98 \times 10^{-5}$ | $1.00 \times 10^{-3}$ | 0.0390    |
| 54    | $1.78 \times 10^{-5}$ | $5.92 \times 10^{-4}$ | 0.0394    | 80    | $1.98 \times 10^{-5}$ | $1.05 \times 10^{-3}$ | 0.0389    |
| 55    | $2.35 \times 10^{-5}$ | $5.87 \times 10^{-4}$ | 0.0394    | 81    | $1.98 \times 10^{-5}$ | $1.10 \times 10^{-3}$ | 0.0389    |
| 56    | $2.90 \times 10^{-5}$ | $5.81 \times 10^{-4}$ | 0.0394    | 82    | $1.98 \times 10^{-5}$ | $1.15 \times 10^{-3}$ | 0.0389    |
| 57    | $1.29 \times 10^{-5}$ | $6.47 \times 10^{-4}$ | 0.0394    | 83    | $1.98 \times 10^{-5}$ | $1.20 \times 10^{-3}$ | 0.0388    |
| 58    | $1.92 \times 10^{-5}$ | $6.41 \times 10^{-4}$ | 0.0394    | 84    | $1.98 \times 10^{-5}$ | $1.25 \times 10^{-3}$ | 0.0388    |
| 59    | $2.54 \times 10^{-5}$ | $6.35 \times 10^{-4}$ | 0.0394    | 85    | $2.77 \times 10^{-5}$ | $5.61 \times 10^{-4}$ | 0.0395    |
| 60    | $3.14 \times 10^{-5}$ | $6.29 \times 10^{-4}$ | 0.0394    | 86    | $5.53 \times 10^{-5}$ | $5.56 \times 10^{-4}$ | 0.0395    |
| 61    | $1.41 \times 10^{-5}$ | $7.05 \times 10^{-4}$ | 0.0394    | 87    | $8.30 \times 10^{-5}$ | $5.56 \times 10^{-4}$ | 0.0395    |
| 62    | $2.09 \times 10^{-5}$ | $6.98 \times 10^{-4}$ | 0.0394    | 88    | $1.11 \times 10^{-5}$ | $5.51 \times 10^{-4}$ | 0.0395    |
| 63    | $2.77 \times 10^{-5}$ | $6.91 \times 10^{-4}$ | 0.0394    | 89    | $3.26 \times 10^{-5}$ | $6.51 \times 10^{-4}$ | 0.0396    |
| 64    | $3.42 \times 10^{-5}$ | $6.85 \times 10^{-4}$ | 0.0394    | 90    | $6.52 \times 10^{-5}$ | $6.51 \times 10^{-4}$ | 0.0396    |
| 65    | $1.55 \times 10^{-5}$ | $7.74 \times 10^{-4}$ | 0.0393    | 91    | $9.68 \times 10^{-5}$ | $6.46 \times 10^{-4}$ | 0.0396    |
| 66    | $2.30 \times 10^{-5}$ | $7.66 \times 10^{-4}$ | 0.0393    | 92    | $1.29 \times 10^{-5}$ | $6.46 \times 10^{-4}$ | 0.0396    |
| 67    | $3.04 \times 10^{-5}$ | $7.59 \times 10^{-4}$ | 0.0393    | 93    | $4.35 \times 10^{-5}$ | $8.66 \times 10^{-4}$ | 0.0393    |
| 68    | $3.76 \times 10^{-5}$ | $7.52 \times 10^{-4}$ | 0.0393    | 94    | $8.59 \times 10^{-5}$ | $8.61 \times 10^{-4}$ | 0.0393    |
| 69    | $1.72 \times 10^{-5}$ | $8.58 \times 10^{-4}$ | 0.0392    | 95    | $1.28 \times 10^{-4}$ | $8.56 \times 10^{-4}$ | 0.0393    |
| 70    | $2.55 \times 10^{-5}$ | $8.50 \times 10^{-4}$ | 0.0392    | 96    | $1.71 \times 10^{-4}$ | $8.56 \times 10^{-4}$ | 0.0393    |
| 71    | $3.37 \times 10^{-5}$ | $8.42 \times 10^{-4}$ | 0.0392    | 97    | $1.97 \times 10^{-6}$ | $7.01 \times 10^{-4}$ | 0.0395    |
| 72    | $4.17 \times 10^{-5}$ | $8.34 \times 10^{-4}$ | 0.0392    | 98    | $1.97 \times 10^{-6}$ | $7.51 \times 10^{-4}$ | 0.0394    |
| 73    | $1.98 \times 10^{-5}$ | $7.01 \times 10^{-4}$ | 0.0393    | 99    | $1.97 \times 10^{-6}$ | $8.01 \times 10^{-4}$ | 0.0394    |
| 74    | $1.98 \times 10^{-5}$ | $7.51 \times 10^{-4}$ | 0.0392    | 100   | $1.97 \times 10^{-6}$ | $8.51 \times 10^{-4}$ | 0.0394    |

| Entry | Eu / mmol             | Tb / mmol             | Gd / mmol | Entry | Eu / mmol             | Tb / mmol             | Gd / mmol |
|-------|-----------------------|-----------------------|-----------|-------|-----------------------|-----------------------|-----------|
| 101   | $1.97 \times 10^{-6}$ | $9.01 \times 10^{-4}$ | 0.0393    | 127   | $1.67 \times 10^{-6}$ | $2.00 \times 10^{-3}$ | 0.0380    |
| 102   | $1.97 \times 10^{-6}$ | $9.51 \times 10^{-4}$ | 0.0393    | 128   | $1.67 \times 10^{-6}$ | $2.10 \times 10^{-3}$ | 0.0379    |
| 103   | $1.97 \times 10^{-6}$ | $1.00 \times 10^{-3}$ | 0.0392    | 129   | $1.67 \times 10^{-6}$ | $2.20 \times 10^{-3}$ | 0.0378    |
| 104   | $1.97 \times 10^{-6}$ | $1.05 \times 10^{-3}$ | 0.0392    | 130   | $1.67 \times 10^{-6}$ | $2.30 \times 10^{-3}$ | 0.0377    |
| 105   | $1.97 \times 10^{-6}$ | $1.10 \times 10^{-3}$ | 0.0391    | 131   | $1.67 \times 10^{-6}$ | $2.40 \times 10^{-3}$ | 0.0376    |
| 106   | $1.97 \times 10^{-6}$ | $1.15 \times 10^{-3}$ | 0.0391    | 132   | $1.67 \times 10^{-6}$ | $2.50 \times 10^{-3}$ | 0.0375    |
| 107   | $1.97 \times 10^{-6}$ | $1.20 \times 10^{-3}$ | 0.0390    | 133   | $1.67 \times 10^{-6}$ | $3.31 \times 10^{-4}$ | 0.0397    |
| 108   | $1.97 \times 10^{-6}$ | $1.25 \times 10^{-3}$ | 0.0390    | 134   | $3.34 \times 10^{-6}$ | $3.26 \times 10^{-4}$ | 0.0397    |
| 109   | $2.76 \times 10^{-6}$ | $5.61 \times 10^{-4}$ | 0.0397    | 135   | $4.93 \times 10^{-6}$ | $3.26 \times 10^{-4}$ | 0.0397    |
| 110   | $5.62 \times 10^{-6}$ | $5.61 \times 10^{-4}$ | 0.0397    | 136   | $6.60 \times 10^{-6}$ | $3.26 \times 10^{-4}$ | 0.0397    |
| 111   | 8.38.E-06             | $5.56 \times 10^{-4}$ | 0.0397    | 137   | $2.25 \times 10^{-6}$ | $3.97 \times 10^{-4}$ | 0.0396    |
| 112   | $1.10 \times 10^{-5}$ | $5.51 \times 10^{-4}$ | 0.0397    | 138   | $4.01 \times 10^{-6}$ | $3.92 \times 10^{-4}$ | 0.0396    |
| 113   | $3.26 \times 10^{-6}$ | $6.51 \times 10^{-4}$ | 0.0396    | 139   | $5.93 \times 10^{-6}$ | $3.92 \times 10^{-4}$ | 0.0396    |
| 114   | $6.51 \times 10^{-6}$ | $6.51 \times 10^{-4}$ | 0.0396    | 140   | $7.85 \times 10^{-6}$ | $3.92 \times 10^{-4}$ | 0.0396    |
| 115   | $9.67 \times 10^{-6}$ | $6.46 \times 10^{-4}$ | 0.0396    | 141   | $2.25 \times 10^{-6}$ | $4.37 \times 10^{-4}$ | 0.0396    |
| 116   | $1.29 \times 10^{-5}$ | $6.46 \times 10^{-4}$ | 0.0396    | 142   | $4.43 \times 10^{-6}$ | $4.37 \times 10^{-4}$ | 0.0396    |
| 117   | $4.34 \times 10^{-6}$ | $8.66 \times 10^{-4}$ | 0.0393    | 143   | $6.60 \times 10^{-6}$ | $4.37 \times 10^{-4}$ | 0.0396    |
| 118   | $8.58 \times 10^{-6}$ | $8.61 \times 10^{-4}$ | 0.0393    | 144   | $8.77 \times 10^{-6}$ | $4.32 \times 10^{-4}$ | 0.0396    |
| 119   | $1.28 \times 10^{-5}$ | $8.56 \times 10^{-4}$ | 0.0393    | 145   | $9.90 \times 10^{-7}$ | $2.01 \times 10^{-4}$ | 0.0398    |
| 120   | $1.71 \times 10^{-6}$ | $8.56 \times 10^{-4}$ | 0.0393    | 146   | $1.98 \times 10^{-6}$ | $1.96 \times 10^{-4}$ | 0.0398    |
| 121   | $1.67 \times 10^{-6}$ | $1.40 \times 10^{-3}$ | 0.0386    | 147   | $2.92 \times 10^{-6}$ | $1.96 \times 10^{-4}$ | 0.0398    |
| 122   | $1.67 \times 10^{-6}$ | $1.50 \times 10^{-3}$ | 0.0385    | 148   | $3.91 \times 10^{-6}$ | $1.96 \times 10^{-4}$ | 0.0398    |
| 123   | $1.67 \times 10^{-6}$ | $1.60 \times 10^{-3}$ | 0.0384    | 149   | $1.09 \times 10^{-6}$ | $2.21 \times 10^{-4}$ | 0.0400    |
| 124   | $1.67 \times 10^{-6}$ | $1.70 \times 10^{-3}$ | 0.0383    | 150   | $2.18 \times 10^{-6}$ | $2.21 \times 10^{-4}$ | 0.0398    |
| 125   | $1.67 \times 10^{-6}$ | $1.80 \times 10^{-3}$ | 0.0382    | 151   | $3.27 \times 10^{-6}$ | $2.21 \times 10^{-4}$ | 0.0398    |
| 126   | $1.67 \times 10^{-6}$ | $1.90 \times 10^{-3}$ | 0.0381    | 152   | $4.36 \times 10^{-6}$ | $2.21 \times 10^{-4}$ | 0.0398    |



| Entry | Eu / mmol             | Tb / mmol             | Gd / mmol | Entry | Eu / mmol             | Tb / mmol             | Gd / mmol |
|-------|-----------------------|-----------------------|-----------|-------|-----------------------|-----------------------|-----------|
| 153   | $2.18 \times 10^{-6}$ | $4.37 \times 10^{-4}$ | 0.0396    | 155   | $6.49 \times 10^{-6}$ | $4.37 \times 10^{-4}$ | 0.0396    |
| 154   | $4.36 \times 10^{-6}$ | $4.37 \times 10^{-4}$ | 0.0396    | 156   | $8.61 \times 10^{-6}$ | $4.32 \times 10^{-4}$ | 0.0396    |

**Table S2.** Synthesis conditions for the lanthanide metals based on Bayesian optimization.

| Entry | Eu / $\mu$ L | Tb / $\mu$ L | Gd / $\mu$ L | Eu / mmol             | Tb / mmol             | Gd / mmol |
|-------|--------------|--------------|--------------|-----------------------|-----------------------|-----------|
| 1     | 20           | 36           | 940          | $9.95 \times 10^{-7}$ | $1.74 \times 10^{-4}$ | 0.0375    |
| 2     | 20           | 37           | 940          | $9.95 \times 10^{-7}$ | $1.84 \times 10^{-4}$ | 0.0375    |
| 3     | 20           | 40           | 940          | $9.95 \times 10^{-7}$ | $1.93 \times 10^{-4}$ | 0.0375    |
| 4     | 20           | 44           | 940          | $9.95 \times 10^{-7}$ | $2.13 \times 10^{-4}$ | 0.0375    |
| 5     | 22           | 40           | 940          | $1.09 \times 10^{-6}$ | $1.93 \times 10^{-4}$ | 0.0375    |
| 6     | 22           | 44           | 940          | $1.09 \times 10^{-6}$ | $2.13 \times 10^{-4}$ | 0.0375    |
| 7     | 24           | 36           | 940          | $1.19 \times 10^{-6}$ | $1.74 \times 10^{-4}$ | 0.0375    |
| 8     | 24           | 38           | 940          | $1.19 \times 10^{-6}$ | $1.84 \times 10^{-4}$ | 0.0375    |
| 9     | 24           | 44           | 940          | $1.19 \times 10^{-6}$ | $2.13 \times 10^{-4}$ | 0.0375    |
| 10    | 26           | 37           | 940          | $1.29 \times 10^{-6}$ | $1.74 \times 10^{-4}$ | 0.0375    |

#### S4 Synthesis of a single MIL-103(Eu, Gd, or Tb)

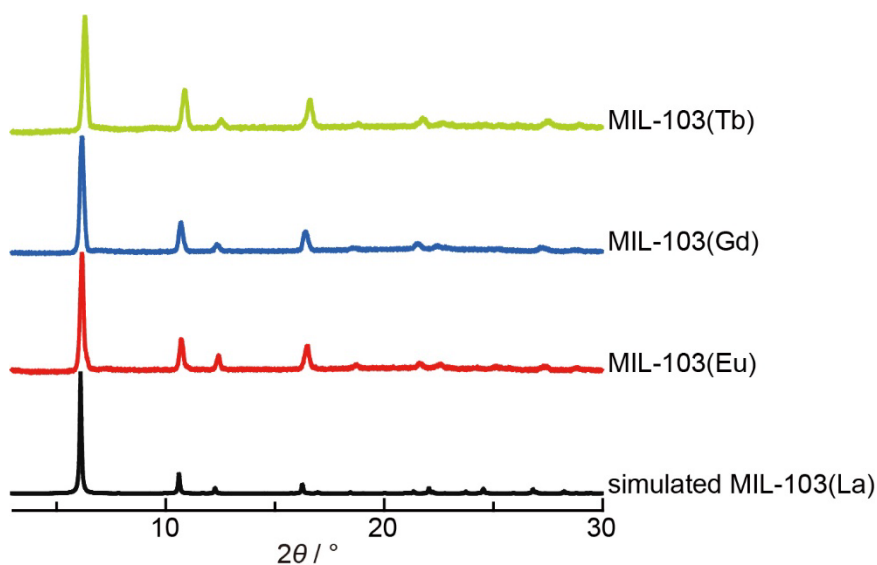

**Fig. S1.** PXRD patterns of MIL-103(Eu, Gd, or Tb). Patterns for La(BTB)(H<sub>2</sub>O) were simulated from reported crystal structures.

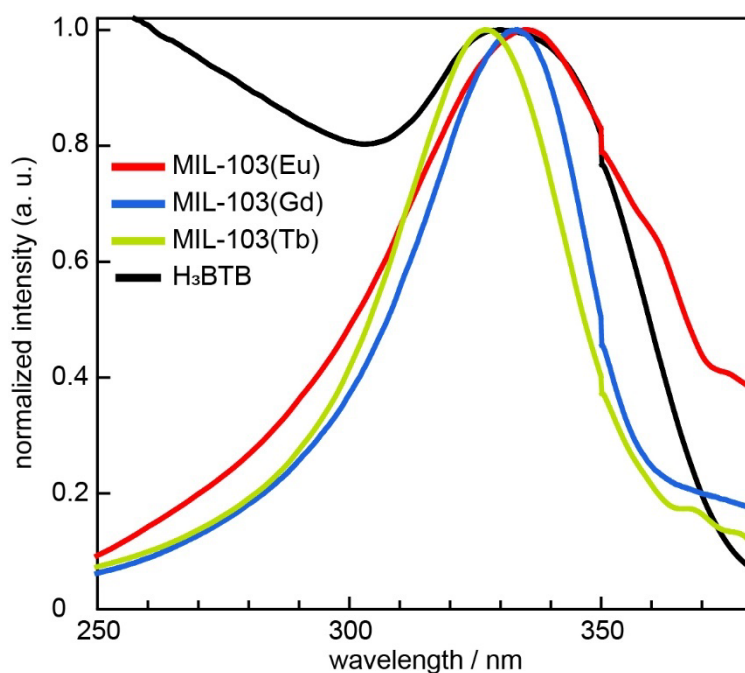

**Fig. S2.** Excitation spectra of MIL-103(Eu,Gd, Tb) and H<sub>3</sub>BTB. Fluorescence wavelength of MIL-103(Eu), MIL-103(Gd), MIL-103(Tb) and H<sub>3</sub>BTB were 615, 615, 545, and 395 nm, respectively.

### S5 Initial screening synthesis of MIL-103 exhibiting white-light emission

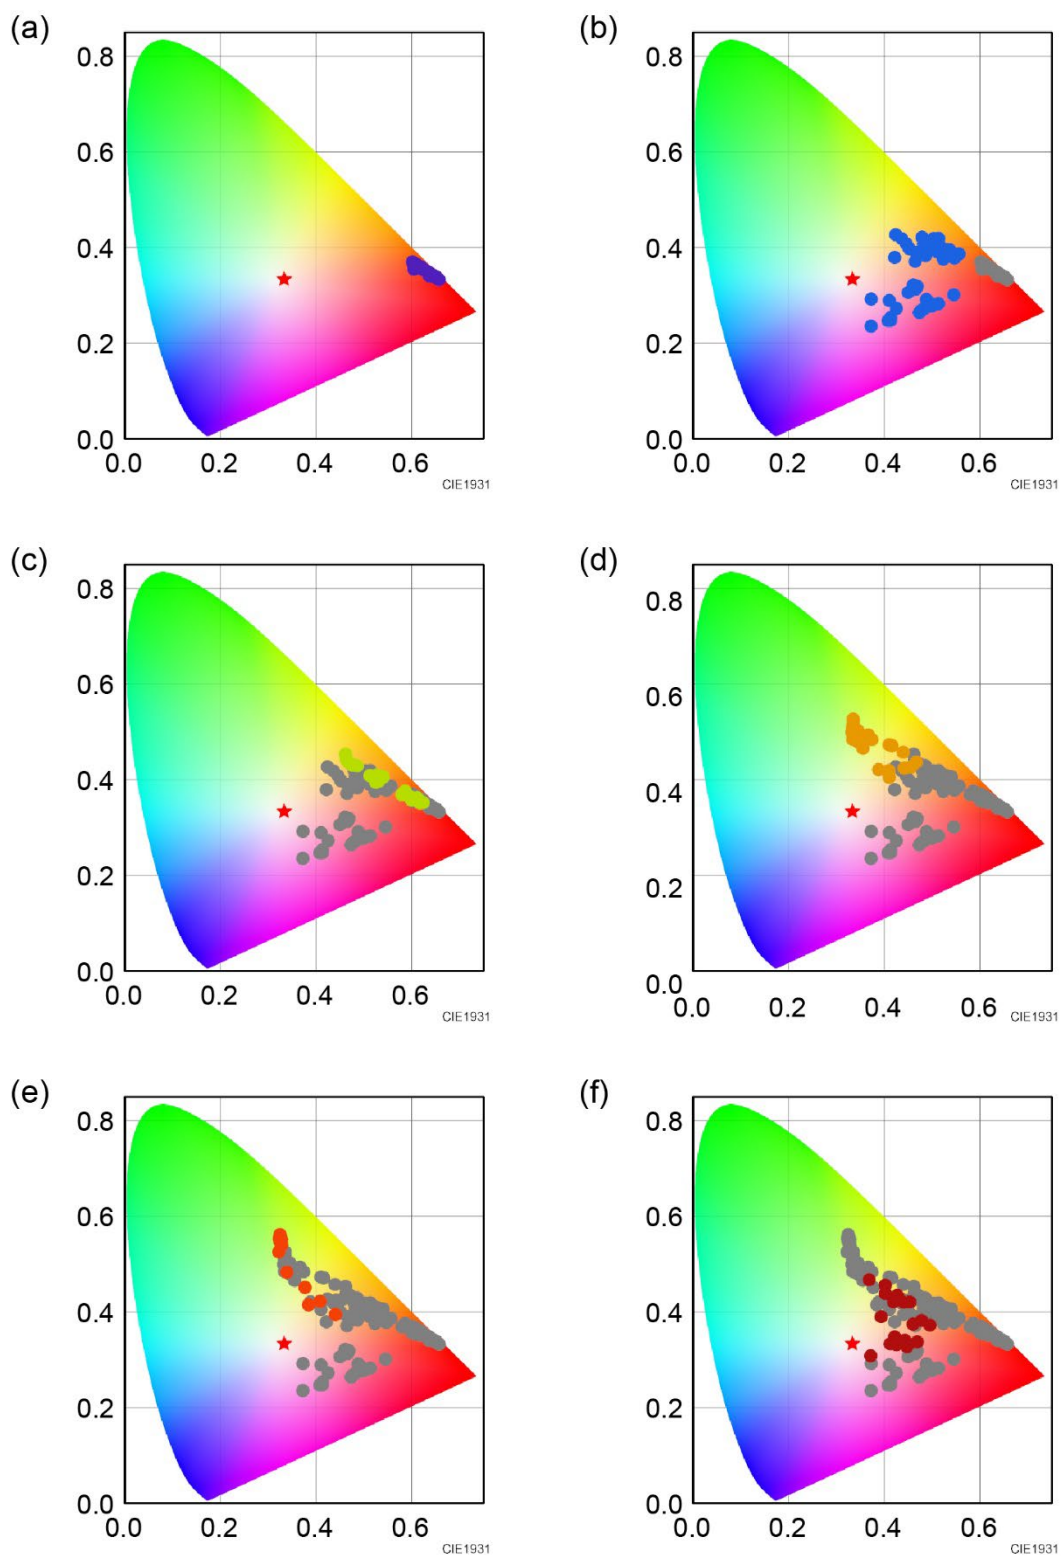

**Fig. S3.** CIE chromaticity diagram for trial experiments 1–6. (a) 1<sup>st</sup> trial. (b) 2<sup>nd</sup> trial. (c) 3<sup>rd</sup> trial. (d) 4<sup>th</sup> trial. (e) 5<sup>th</sup> trial. (f) 6<sup>th</sup> trial.

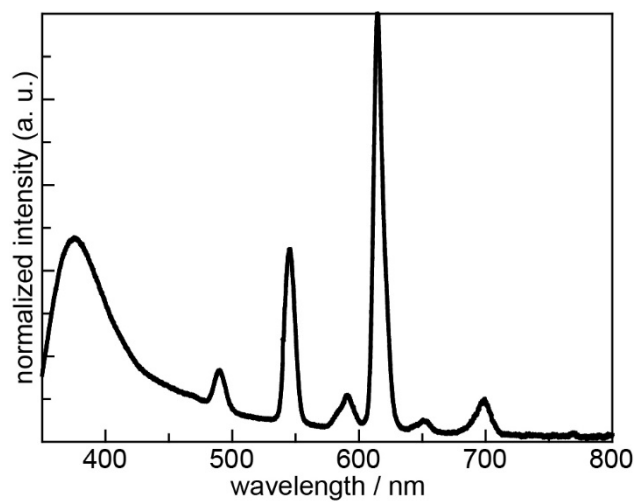

**Fig. S4.** Emission spectra of MIL-103(Eu<sub>x</sub>Gd<sub>y</sub>Tb<sub>z</sub>; Eu =  $2.7 \times 10^{-5}$ , Tb =  $5.6 \times 10^{-3}$ , Gd =  $9.94 \times 10^{-1}$ ) (entry 149 in Table S1) which was the closest to white-light emission in the initial screening. Excitation wavelength was 295 nm.

## S6 Bayesian optimization of composition of MIL-103 showing white-light emission

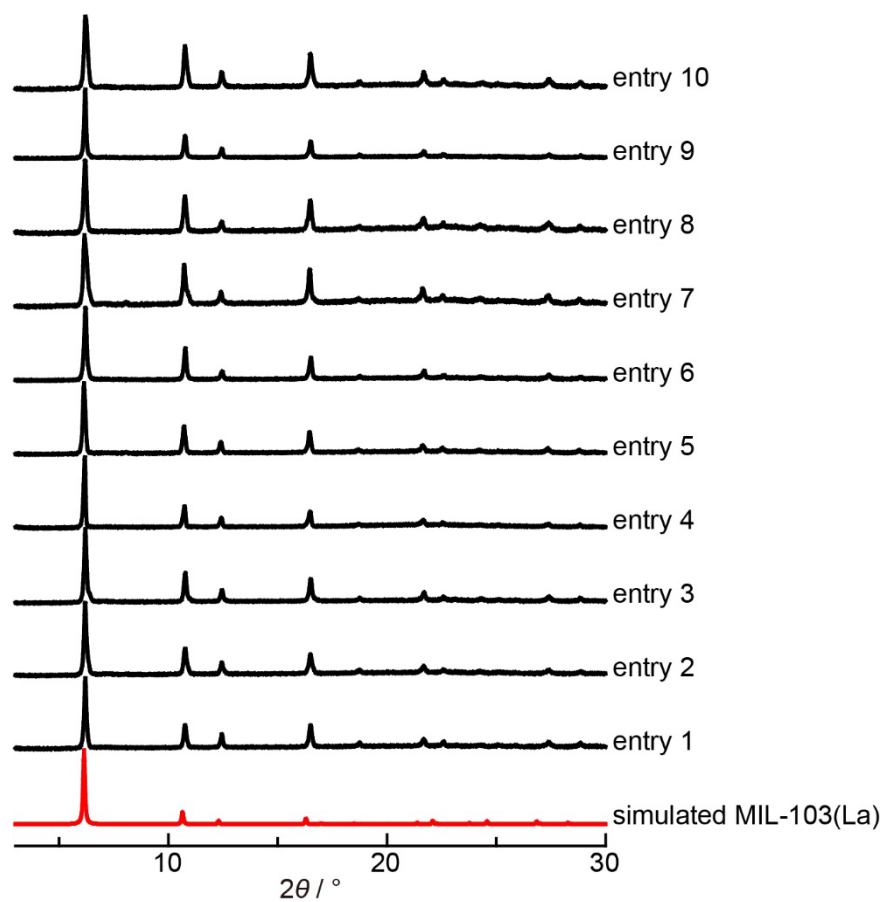

**Fig. S5.** PXRD pattern of MIL-103 synthesized based on optimal conditions using Bayesian optimization. For detailed conditions of each entry, see Table S2. Patterns for La(BTB)(H<sub>2</sub>O) were simulated from reported crystal structures.

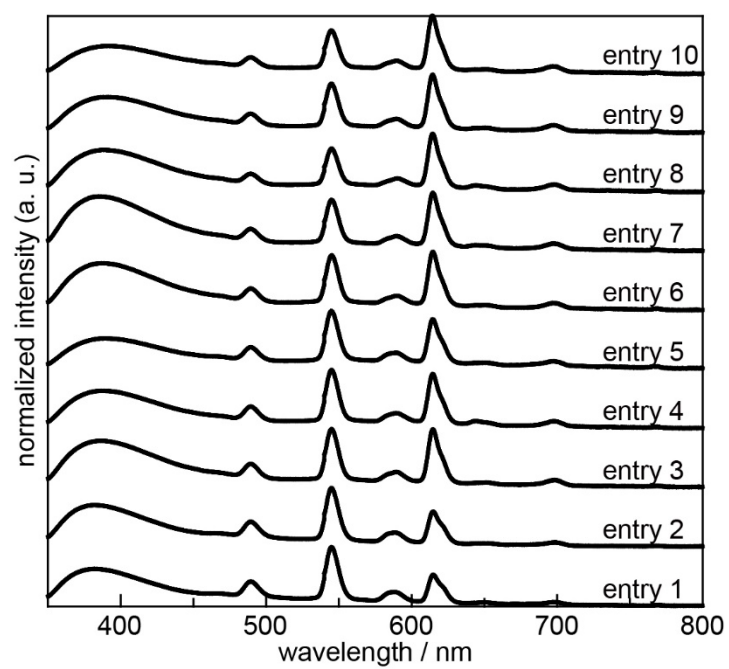

**Fig. S6.** Emission spectra of MIL-103 synthesized based on optimal conditions by Bayesian optimization. For detailed conditions of each entry, see Table S2.
